# Supplementary material
Source: PubMed Central journal article supplement (PMC5314986)
Supplement: Supp_Figure1.pdf [file Supp_Figure1.pdf]

## Supplementary Data

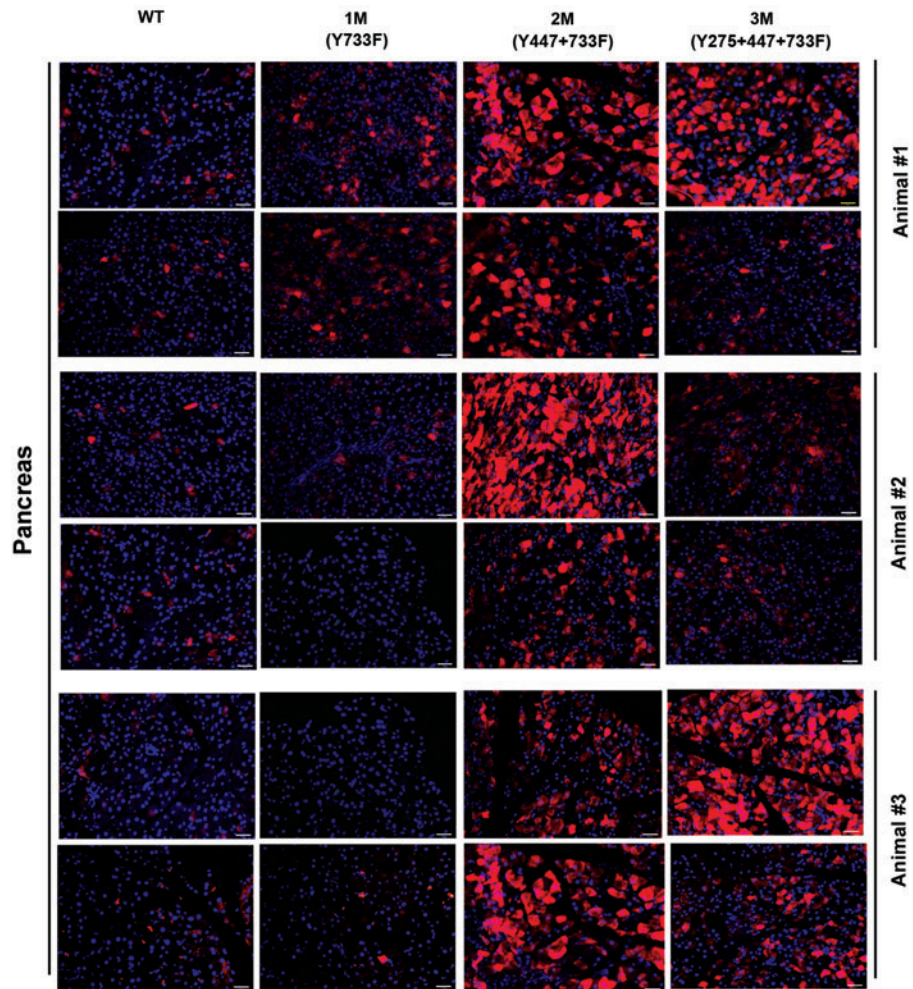

**Supplementary Figure 1.** Fluorescence microscope image in pancreas tissues. Blue: DAPI staining for nuclei; red: mCherry expression.  $n=3$  per group; two sections from each animal were analyzed. Scale bar:  $65\ \mu\text{m}$ .
