# Supplementary material
Source: PubMed Central journal article supplement (PMC5314986)
Supplement: Supp_Figure2.pdf [file Supp_Figure2.pdf]

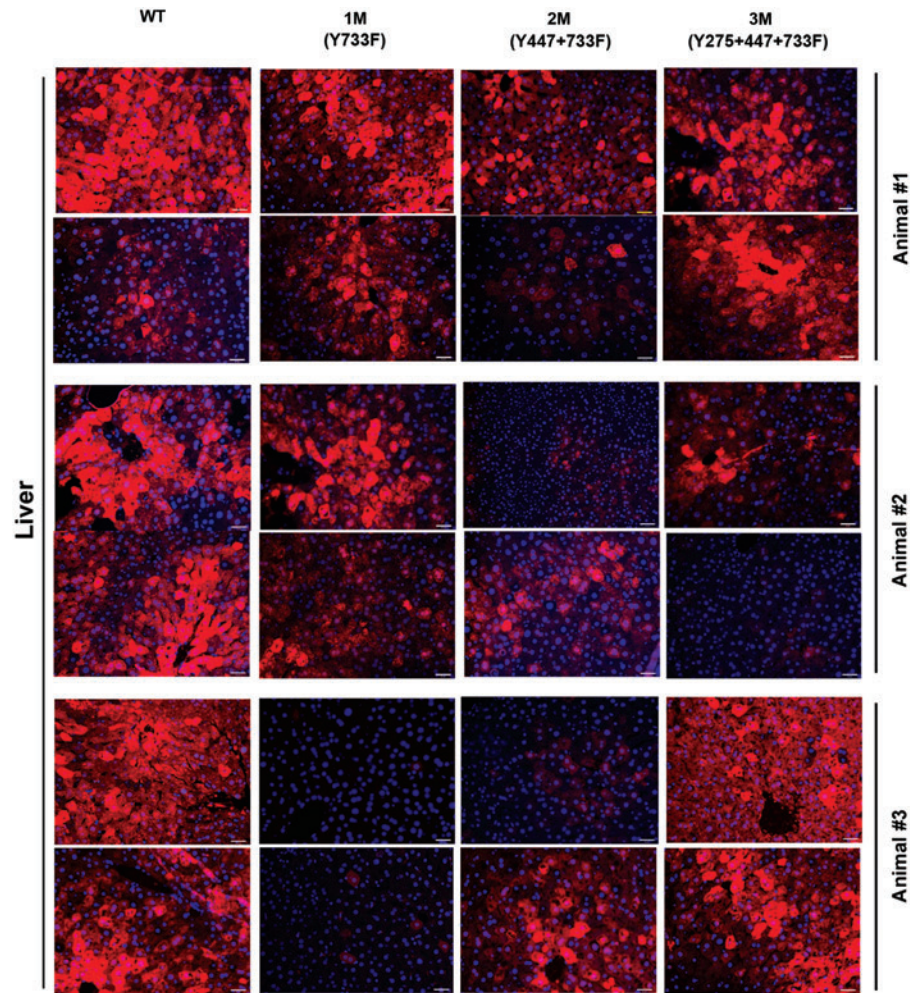

**Supplementary Figure 2.** Fluorescence microscope image in liver tissues. Blue: DAPI staining for nuclei, red: mCherry expression.  $n=3$  per group; two sections from each animal were analyzed. Scale bar:  $65\mu\text{m}$ .
